# Supplementary material
Source: publisher site journal article supplement (https://www.degruyterbrill.com/publication/isbn/9783110364729/downloadAsset/9783110364729_Inhaltsverzeichnis--de.pdf)
Supplement: Supplementary file 1 [file 9783110364729_Inhaltsverzeichnis--de.pdf]

# Inhaltsverzeichnis

|                                                                    |            |
|--------------------------------------------------------------------|------------|
| <b>Vorwort</b>                                                     | <b>V</b>   |
| <b>Elementare Grundlagen</b>                                       | <b>1</b>   |
| <b>1 Grundkenntnisse der Arithmetik und analytischen Geometrie</b> | <b>1</b>   |
| 1.1 Zahlenbereiche, Grundrechenarten . . . . .                     | 2          |
| 1.2 Potenzen, Wurzeln, Logarithmen . . . . .                       | 12         |
| 1.3 Indizierung, Summen, Produkte . . . . .                        | 17         |
| 1.4 Kombinatorik . . . . .                                         | 23         |
| 1.5 Gleichungen und Ungleichungen mit einer Variablen . . . . .    | 31         |
| 1.6 Analytische Geometrie der Ebene . . . . .                      | 42         |
| 1.7 Grundlagen der Trigonometrie . . . . .                         | 55         |
| 1.8 Komplexe Zahlen . . . . .                                      | 62         |
| 1.9 Gleichungen höheren Grades . . . . .                           | 68         |
| <b>Formale Grundlagen</b>                                          | <b>81</b>  |
| <b>2 Aussagenlogik</b>                                             | <b>81</b>  |
| 2.1 Aussagen und ihre Verknüpfungen . . . . .                      | 82         |
| 2.2 Allaussagen, Existenzaussagen . . . . .                        | 94         |
| 2.3 Mathematische Beweisführung . . . . .                          | 96         |
| <b>3 Mengen</b>                                                    | <b>107</b> |
| 3.1 Einführung und Darstellungsformen . . . . .                    | 108        |
| 3.2 Schnitt- und Vereinigungsmengen . . . . .                      | 114        |
| 3.3 Differenzmengen . . . . .                                      | 119        |
| <b>4 Binäre Relationen</b>                                         | <b>125</b> |
| 4.1 Einführung und Darstellungsformen . . . . .                    | 125        |
| 4.2 Inverse und zusammengesetzte Relationen . . . . .              | 130        |
| 4.3* Ordnungseigenschaften von Mengen . . . . .                    | 134        |
| 4.4* Äquivalenzrelationen . . . . .                                | 137        |
| 4.5* Präordnungen . . . . .                                        | 140        |

|                                                               |            |
|---------------------------------------------------------------|------------|
| <b>Analysis von Funktionen einer Variablen</b>                | <b>151</b> |
| <b>5 Reelle Funktionen einer Variablen</b>                    | <b>151</b> |
| 5.1 Funktionen als spezielle Relationen . . . . .             | 151        |
| 5.2 Beispiele für reelle Funktionen einer Variablen . . . . . | 159        |
| 5.3 Eigenschaften reeller Funktionen . . . . .                | 166        |
| <b>6 Elementare reelle Funktionen</b>                         | <b>175</b> |
| 6.1 Polynome . . . . .                                        | 175        |
| 6.2 Rationale Funktionen . . . . .                            | 179        |
| 6.3 Potenz- und Wurzelfunktionen . . . . .                    | 186        |
| 6.4 Exponential- und Logarithmusfunktionen . . . . .          | 188        |
| 6.5 Trigonometrische Funktionen . . . . .                     | 193        |
| <b>7 Grenzwerte und Stetigkeit</b>                            | <b>199</b> |
| 7.1 Unendliche Zahlenfolgen . . . . .                         | 199        |
| 7.2 Grenzwerte reeller Funktionen . . . . .                   | 210        |
| 7.3 Stetige Funktionen . . . . .                              | 213        |
| 7.4 Zwischenwertsatz . . . . .                                | 221        |
| <b>8 Differentiation von Funktionen einer Variablen</b>       | <b>225</b> |
| 8.1 Differenzenquotient und Differentiation . . . . .         | 226        |
| 8.2 Differentiationsregeln . . . . .                          | 231        |
| 8.3 Differentialquotienten elementarer Funktionen . . . . .   | 234        |
| 8.4 Differentialquotienten höherer Ordnung . . . . .          | 239        |
| 8.5 Änderungsraten und Elastizitäten . . . . .                | 242        |
| <b>9 Kurvendiskussion</b>                                     | <b>249</b> |
| 9.1 Monotonie und Konvexität . . . . .                        | 249        |
| 9.2 Extremwertbestimmung . . . . .                            | 258        |
| 9.3 Approximation reeller Funktionen durch Polynome . . . . . | 267        |
| <b>10 Integration von Funktionen einer Variablen</b>          | <b>279</b> |
| 10.1 Das unbestimmte Integral . . . . .                       | 280        |
| 10.2 Bestimmtes Integral und Flächenberechnung . . . . .      | 292        |
| 10.3 Uneigentliche Integrale . . . . .                        | 309        |
| <b>Lineare Algebra</b>                                        | <b>315</b> |
| <b>11 Matrizen und Vektoren</b>                               | <b>315</b> |
| 11.1 Einführende Bemerkungen zur Schreibweise . . . . .       | 316        |
| 11.2 Regeln der Addition und Subtraktion . . . . .            | 324        |
| 11.3 Regeln der Multiplikation . . . . .                      | 330        |

|                                                                                |            |
|--------------------------------------------------------------------------------|------------|
| <b>12 Punktmengen im <math>\mathbb{R}^n</math></b>                             | <b>341</b> |
| 12.1 Absolutbetrag von Vektoren . . . . .                                      | 341        |
| 12.2 Hyperebenen und Kugelflächen . . . . .                                    | 345        |
| 12.3 Offene und abgeschlossene Punktmengen . . . . .                           | 347        |
| 12.4 Konvexe Mengen . . . . .                                                  | 352        |
| <b>13 Vektorräume</b>                                                          | <b>363</b> |
| 13.1 Vektorräume im $\mathbb{R}^n$ , Basis und Dimension . . . . .             | 363        |
| 13.2 Basistausch in Vektorräumen . . . . .                                     | 368        |
| 13.3 Rang einer Matrix . . . . .                                               | 377        |
| <b>14 Lineare Gleichungssysteme</b>                                            | <b>391</b> |
| 14.1 Einführende Beispiele . . . . .                                           | 391        |
| 14.2 Lösbarkeit linearer Gleichungssysteme . . . . .                           | 395        |
| 14.3 Lösung homogener Gleichungssysteme . . . . .                              | 405        |
| 14.4 Lösung inhomogener Gleichungssysteme . . . . .                            | 411        |
| 14.5 Zusammenhang mit Vektorräumen . . . . .                                   | 415        |
| <b>15 Lineare Abbildungen</b>                                                  | <b>421</b> |
| 15.1 Eigenschaften linearer Abbildungen . . . . .                              | 421        |
| 15.2 Inverse und orthogonale Matrizen . . . . .                                | 428        |
| <b>16* Lineare Optimierung</b>                                                 | <b>441</b> |
| 16.1 Darstellungsformen und Anwendungen . . . . .                              | 442        |
| 16.2 Graphische Lösungsverfahren . . . . .                                     | 445        |
| 16.3 Theoretische Grundlagen . . . . .                                         | 450        |
| 16.4 Simplexalgorithmus und Standardmaximumproblem . . . . .                   | 453        |
| 16.5 Dualität und Standardminimumproblem . . . . .                             | 465        |
| <b>17 Determinante einer Matrix</b>                                            | <b>473</b> |
| 17.1 Determinanten und ihre Berechnung . . . . .                               | 473        |
| 17.2 Einige Aussagen über Determinanten . . . . .                              | 481        |
| 17.3 Zusammenhang mit Matrizenrängen und linearen Gleichungssystemen . . . . . | 487        |
| <b>18 Eigenwertprobleme</b>                                                    | <b>493</b> |
| 18.1 Einführende Beispiele . . . . .                                           | 493        |
| 18.2 Eigenwerte und Eigenvektoren . . . . .                                    | 496        |
| 18.3 Existenz reeller Eigenwerte . . . . .                                     | 504        |
| 18.4 Definite Matrizen . . . . .                                               | 513        |

|                                                                                  |            |
|----------------------------------------------------------------------------------|------------|
| <b>Analysis von Funktionen mehrerer Variablen</b>                                | <b>521</b> |
| <b>19 Reelle Funktionen mehrerer Variablen</b>                                   | <b>521</b> |
| 19.1 Darstellung und Beispiele . . . . .                                         | 521        |
| 19.2 Stetigkeit und partielle Differentiation . . . . .                          | 528        |
| 19.3 Richtungsableitungen . . . . .                                              | 537        |
| 19.4 Partielle Ableitungen zweiter Ordnung und totales Differential . . . . .    | 544        |
| <b>20 Kurvendiskussion für Funktionen mehrerer Variablen</b>                     | <b>551</b> |
| 20.1 Monotonie und Konvexität . . . . .                                          | 552        |
| 20.2 Extremwertbestimmung . . . . .                                              | 554        |
| 20.3 Einfache lineare Regression . . . . .                                       | 561        |
| 20.4*Optimierung mit Nebenbedingungen . . . . .                                  | 566        |
| <b>21 Mehrfache Integrale</b>                                                    | <b>581</b> |
| 21.1 Parameterintegrale . . . . .                                                | 581        |
| 21.2 Doppelintegrale . . . . .                                                   | 586        |
| <b>Differenzen- und Differentialgleichungen</b>                                  | <b>593</b> |
| <b>22 Differenzen- und Differentialgleichungen erster Ordnung</b>                | <b>593</b> |
| 22.1 Grundlagen und Beispiele . . . . .                                          | 594        |
| 22.2 Lösung von Differenzengleichungen erster Ordnung . . . . .                  | 600        |
| 22.3 Lösung von Differentialgleichungen erster Ordnung . . . . .                 | 606        |
| <b>23 Differenzen- und Differentialgleichungen höherer Ordnung</b>               | <b>613</b> |
| 23.1 Grundlagen und Beispiele . . . . .                                          | 613        |
| 23.2 Homogene lineare Differenzen- und Differentialgleichungen . . . . .         | 615        |
| 23.3 Inhomogene lineare Differenzen- und Differentialgleichungen . . . . .       | 627        |
| <b>24 Differenzen- und Differentialgleichungssysteme erster Ordnung</b>          | <b>637</b> |
| 24.1 Grundlagen und Beispiele . . . . .                                          | 637        |
| 24.2 Homogene lineare Differenzen- und Differentialgleichungssysteme . . . . .   | 640        |
| 24.3 Inhomogene lineare Differenzen- und Differentialgleichungssysteme . . . . . | 650        |
| <b>Stichwortverzeichnis</b>                                                      | <b>659</b> |
| <b>Symbolverzeichnis</b>                                                         | <b>669</b> |
| <b>Griechisches Alphabet</b>                                                     | <b>677</b> |
| <b>Literaturverzeichnis</b>                                                      | <b>679</b> |
